# Supplementary material for: Directed Evolution of AAV Serotype 5 for Increased Hepatocyte Transduction and Retained Low Humoral Seroreactivity
Source: PubMed Central journal article supplement (PMC7773954; doi:10.1016/j.omtm.2020.10.010), 2020-10-20
Supplement: mmc1.pdf [file mmc1.pdf]

OMTM, Volume ■ ■ ■

## **Supplemental Information**

### **Directed Evolution of AAV Serotype 5 for Increased Hepatocyte Transduction and Retained Low Humoral Seroreactivity**

**Randolph Qian, Bin Xiao, Juan Li, and Xiao Xiao**

## Supplemental Figures

>MV1

MSFVDHPPDWLEEVGEGREFLGLLEAGPPKPKPNQQHQDQARGLVLPGYNYLGPNGLDRGEP  
VNRADDEVAREHDISYNEQLEAGDNPYLKYNHADADEFQEKLADDTSFGGNLGKAVFQAKKRVLE  
PFGLVEEGAKTAPTGKRIDDHFPKRKKARTEEDSKPSTSSDAEAGPSGSQQQLQIPAPASSLGADT  
MSAGGGGGLGDNNQGADGVGNASGDWHCDSTWMGDRVVTKSTRTWVLPYNNHQYREIKSG  
SVD<sup>R</sup>SNANAYFGYSTPWGYFDFNRFHSHWSPRDWQRLINNYWGFRPRSLRVKIFNIQVKEVTVQ  
DSTTTIANNLTSTVQVFTDDDDYQLPYVVGNGTEGCLPAFPPQVFTLPQYGYATLNRDNTENPTER  
SSFFCLEYFPSKMLRTGNNFEFTYNFEEVPPFHSS<sup>L</sup>APSQNLFKLANPLVDQYLRFVSTNNTGGV  
QFNKNLAGRYANTYKNWFPGPMGRTOGWNLGSGVNRASVSAFATTNRMELEGASYQVPPQPN  
GMTNNLQGSNTYALENTMIFNSQPANPGTTATYLEGNMLITSESETQPVNRVAYNVGGQMATN  
NQSSTTAPATGTYNLQEIIVPGSVWMERDVYLGPIWAKIPETGAHFHPSAMGGFGLKHPPPM  
LIKNTVPVGNITSFSDVPVSSFITQYSTGQVTVEMEWELKKENSKRWNPEIQYTNNDPQFVDF  
APDSTGEYRSTRPIGTRYLTRPL

>MV18

MSFVDHPPDWLEEVGEGREFLGLLEAGPPKPKPNQQHQDQARGLVLPGYNYLGPNGLDRGEP  
VNRADDEVAREHDISYNEQLEAGDNPYLKYNHADADEFQEKLADDTSFGGNLGKAVFQAKKRVLE  
PFGLVEEGAKTAPTGKRIDDHFPKRKKARTEEDSKPSTSSDAEAGPSGSQQQLQIPAPASSLGADT  
MSAGGGGGLGDNNQGADGVGNASGDWHCDSTWMGDRVVTKSTRTWVLPYNNHQYREIKSG  
SVD<sup>R</sup>SNANAYFGYSTPWGYFDFNRFHSHWSPRDWQRLINNYWGFRPRSLRVKIFNIQVKEVTVQ  
DSTTTIANNLTSTVQVFTDDDDYQLPYVVGNGTEGCLPAFPPQVFTLPQYGYATLNRDNTENPTER  
SSFFCLEYFPSKMLRTGNNFEFTYNFEEVPPFHSS<sup>F</sup>APSQNLFKLANPLVDQYLRFVSTNNTGGV  
QFNKNLAGRYANTYKNWFPGPMGRTOGWNLGSGVNRASVSAFATTNRMELEGASYQVPPQPN  
GMTNNLQGSNTYALENTMIFNSQPANPGTTATYLEGNMLITSESETQPVNRVAYNVGGQMATN  
NQSSTTAPATGTYNLQEIIVPGSVWMERDVYLGPIWAKIPETGAHFHPSAMGGFGLKHPPPM  
LIKNTVPVGNITSFSDVPVSSFITQYSTGQVTVEMEWELKKENSKRWNPEIQYTNNDPQFVDF  
APDSTGEYRTRPIGTRYLTRPL

>MV20

MSFVDHPPDWLEEVGEGREFLGLLEAGPPKPKPNQQHQDQARGLVLPGYNYLGPNGLDRGEP  
VNRADDEVAREHDISYNEQLEAGDNPYLKYNHADADEFQEKLADDTSFGGNLGKAVFQAKKRVLE  
PFGLVEEGAKTAPTGKRIDDHFPKRKKARTEEDSKPSTSSDAEAGPSGSQQQLQIPAPASSLGADT  
MSAGGGG<sup>S</sup>LGDNQADGVGNASGDWHCDSTWMGDRVVTKSTRTWVLPYNNHQYREIKSG  
SVDG<sup>S</sup>SNANAYFGYSTPWGYFDFNRFHSHWSPRDWQRLINNYWGFRPRSLRVKIFNIQVKEVTV  
QDSTTTIANNLTSTVQVFTDDDDYQLPYVVGNGTEGCLPAFPPQVFTLPQYGYATLNRDNTENPTE  
RSSFFCLEYFPSKMLRTGNNFEFTYNFEEVPPFHSS<sup>F</sup>APSQNLFKLANPLVDQYLRFVSTNNTGG  
VQFNKNLAGRYANTYKNWFPGPI<sup>G</sup>RTOGWNLGSGVNRASVSAFATTNRMELEGASYQVPPQPN  
GMTNNLQGSNTYALENTMIFNSQPANPGTTATYLEGNMLITSESETQPVNRVAYNVGGQMATN  
NQSSTT<sup>T</sup>PATGTYNLQEIIVPGSVWMERDVYLGPIWAKIPETGAHFHPSAMGGFGLKHPPPM  
LIKNTVPVGNITSFSDVPVSSFITQYSTGQVTVEMEWELKKENSKRWNPEIQYTNNDPQFVDF  
APDSTGEYRSTRPIGTRYLTRPL

>MV50

MSFVDHPPDWLEEVGEGREFLBLEAGPPKPKPNQQHQDQARGLVLPGYNYLGPNGNLDREGP  
VNRADDEVAREHDISYNEQLEAGDNPYLKYNHADADEFQEKLADDTSGGNGLGAQVFQAKKRVLE  
PFGLVEEGAKTAPTGKRIDDHFPKRKKARTEEDSKPSTSSDAEAGPSGSQQLQIPASSLGADT  
MSAGGGGGLGDNNQGADGVGNASGDWHCDSTWMGDRVVTKSTRTWLPSYNNHQYREIKSG  
SVD<sup>R</sup>SNANAYFGYSTPWGYFDFNRFHSHWSPRDWQRLINNYWGFRPRSLRVKIFNIQVKEVTVQ  
DSTTTIANNLTSTVQVFTDDDDYQLPYVVGNGTEGCLPAFPQVFTLPQYGYATLNRDNTENPTER  
SSFFCLEYFPSKMLRTGNNFEFTYNFEEVPFHSSFAPSQNLFLANPLVDQYLRFVSTNNTGGV  
QFNKNLAGRYANTYKNWFPMPMGRTOGWNLGSGVNRASVSFAFATTNRMELEGASYQVPPQPN  
GMTNNLQGSNTYALENTMIFNSQPANPGTTATYLEGNMLITSESETQPVNRVAYNVGGQMATN  
NQSSTTAPATGTYNLQEI VPGSVWMERDVYLGPIWAKIPETGAHFHPSAMGGFGLKHPPPM  
LIKNTPVPGNITSFSDVPVSSFITQYSTGQVTVEMEWELKKENSKRWNPEIQYTNNYNDPQFVDF  
APD<sup>G</sup>TGEYRSTRPIGTRYLTRPL

>MV53

MSFVDHPPDWLEEVGEGREFLBLEAGPPKPKPNQQHQDQARGLVLPGYNYLGPNGNLDREGP  
VNRADDEVAREHDISYNEQLEAGDNPYLKYNHADADEFQEKLADDTSGGNGLGAQVFQAKKRVLE  
PFGLVEEGAKTAPTGKRIDDHFPKRKKARTEEDSKPSTSSDAEAGPSGSQQL<sup>R</sup>IPASSLGADT  
MSAGGGGGLGDNNQGADGVGNASGDWHCDSTWMGDRVVTKSTRTWLPSYNNHQYREIKSG  
SVD<sup>R</sup>SNANAYFGYSTPWGYFDFNRFHSHWSPRDWQRLINNYWGFRPRSLRVKIFNIQVKEVTVQ  
DSTTTIANNLTSTVQVFTDDDDYQLPYVVGNGTEGCLPAFPQVFTLPQYGYATLNRDNTENPTER  
SSFFCLEYFPSKMLRTGNNFEFTYNFEEVPFHSSFAPSQNLFLANPLVDQYLRFVSTNNTGGV  
QFNKNLAGRYANTYKNWFPMPMGRTOGWNLGSGVNRASVSFAFATTNRMELEGASYQVPPQPN  
GMTNNLQGSNTYALENTMIFNSQPANPGTTATYLEGNMLITSESETQPVNRVAYNVGGQMATN  
NQSSTTAPATGTYNLQEI VPGSVWMERDVYLGPIWAKIPETGAHFHPSAMGGFGLKHPPPM  
LIKNTPVPGNITSFSDVPVSSFITQYSTGQVTVEMEWELKKENSKRWNPEIQYTNNYNDPQFVDF  
APD<sup>S</sup>TGEYRTRPIGTRYLTRPL

Figure S1: Amino Acid Sequence for Best Performing AAV5 Variants

Amino acid sequences for best performing variants. The mutations that differ from AAV5 are highlighted in red.

AAV5 1 MSFVDHPPDWLEEVGEGFLREFLGLLEAGPPKPKPNQQHQDQARGLVLPGYNYLGPNGGLDR  
MV1 1 MSFVDHPPDWLEEVGEGFLREFLGLLEAGPPKPKPNQQHQDQARGLVLPGYNYLGPNGGLDR  
MV18 1 MSFVDHPPDWLEEVGEGFLREFLGLLEAGPPKPKPNQQHQDQARGLVLPGYNYLGPNGGLDR  
MV20 1 MSFVDHPPDWLEEVGEGFLREFLGLLEAGPPKPKPNQQHQDQARGLVLPGYNYLGPNGGLDR  
MV50 1 MSFVDHPPDWLEEVGEGFLREFLGLLEAGPPKPKPNQQHQDQARGLVLPGYNYLGPNGGLDR  
MV53 1 MSFVDHPPDWLEEVGEGFLREFLGLLEAGPPKPKPNQQHQDQARGLVLPGYNYLGPNGGLDR

AAV5 61 GEPVNRADDEVAREHDI SYNEQLEAGDNPYLKYNHADADEFQEKLADDTSFGGNLGKAVFQA  
MV1 61 GEPVNRADDEVAREHDI SYNEQLEAGDNPYLKYNHADADEFQEKLADDTSFGGNLGKAVFQA  
MV18 61 GEPVNRADDEVAREHDI SYNEQLEAGDNPYLKYNHADADEFQEKLADDTSFGGNLGKAVFQA  
MV20 61 GEPVNRADDEVAREHDI SYNEQLEAGDNPYLKYNHADADEFQEKLADDTSFGGNLGKAVFQA  
MV50 61 GEPVNRADDEVAREHDI SYNEQLEAGDNPYLKYNHADADEFQEKLADDTSFGGNLGKAVFQA  
MV53 61 GEPVNRADDEVAREHDI SYNEQLEAGDNPYLKYNHADADEFQEKLADDTSFGGNLGKAVFQA

AAV5 121 KKRVLPEPFLVEEGAKTAPTGKRIDDHFPKRKKARTEEDSKPSTSSDAEAGPSGSQQLQI  
MV1 121 KKRVLPEPFLVEEGAKTAPTGKRIDDHFPKRKKARTEEDSKPSTSSDAEAGPSGSQQLQI  
MV18 121 KKRVLPEPFLVEEGAKTAPTGKRIDDHFPKRKKARTEEDSKPSTSSDAEAGPSGSQQLQI  
MV20 121 KKRVLPEPFLVEEGAKTAPTGKRIDDHFPKRKKARTEEDSKPSTSSDAEAGPSGSQQLQI  
MV50 121 KKRVLPEPFLVEEGAKTAPTGKRIDDHFPKRKKARTEEDSKPSTSSDAEAGPSGSQQLQI  
MV53 121 KKRVLPEPFLVEEGAKTAPTGKRIDDHFPKRKKARTEEDSKPSTSSDAEAGPSGSQQLRI

AAV5 181 PAQPASSLGADTMSAGGGGPLGDNNQGADGVGNASGDWHCDSTWMGDRVVTKSTRTWVLP  
MV1 181 PAQPASSLGADTMSAGGGGPLGDNNQGADGVGNASGDWHCDSTWMGDRVVTKSTRTWVLP  
MV18 181 PAQPASSLGADTMSAGGGGPLGDNNQGADGVGNASGDWHCDSTWMGDRVVTKSTRTWVLP  
MV20 181 PAQPASSLGADTMSAGGGGSLGDNNQGADGVGNASGDWHCDSTWMGDRVVTKSTRTWVLP  
MV50 181 PAQPASSLGADTMSAGGGGPLGDNNQGADGVGNASGDWHCDSTWMGDRVVTKSTRTWVLP  
MV53 181 PAQPASSLGADTMSAGGGGPLGDNNQGADGVGNASGDWHCDSTWMGDRVVTKSTRTWVLP

AAV5 241 SYNHHQYREIKSGSVDGSRANAYFGYSTPWGYFDNRFHSHWSPRDWQRLINNYWGFRRP  
MV1 241 SYNHHQYREIKSGSVDRSNANAYFGYSTPWGYFDNRFHSHWSPRDWQRLINNYWGFRRP  
MV18 241 SYNHHQYREIKSGSVDRSNANAYFGYSTPWGYFDNRFHSHWSPRDWQRLINNYWGFRRP  
MV20 241 SYNHHQYREIKSGSVDGSRANAYFGYSTPWGYFDNRFHSHWSPRDWQRLINNYWGFRRP  
MV50 241 SYNHHQYREIKSGSVDRSNANAYFGYSTPWGYFDNRFHSHWSPRDWQRLINNYWGFRRP  
MV53 241 SYNHHQYREIKSGSVDRSNANAYFGYSTPWGYFDNRFHSHWSPRDWQRLINNYWGFRRP

AAV5 301 SLRVKIFNIQVKEVTVQDSTTTIANNLTSTVQVFTDDDDYQLPYVVGNGTEGCLPAFPPQV  
MV1 301 SLRVKIFNIQVKEVTVQDSTTTIANNLTSTVQVFTDDDDYQLPYVVGNGTEGCLPAFPPQV  
MV18 301 SLRVKIFNIQVKEVTVQDSTTTIANNLTSTVQVFTDDDDYQLPYVVGNGTEGCLPAFPPQV  
MV20 301 SLRVKIFNIQVKEVTVQDSTTTIANNLTSTVQVFTDDDDYQLPYVVGNGTEGCLPAFPPQV  
MV50 301 SLRVKIFNIQVKEVTVQDSTTTIANNLTSTVQVFTDDDDYQLPYVVGNGTEGCLPAFPPQV  
MV53 301 SLRVKIFNIQVKEVTVQDSTTTIANNLTSTVQVFTDDDDYQLPYVVGNGTEGCLPAFPPQV

AAV5 361 FTLPQYGYATLNRDNTENPTERSSFFCLEYFPSKMLRTGNNFEFTYNFEEVFPFHSSFAFAPS  
MV1 361 FTLPQYGYATLNRDNTENPTERSSFFCLEYFPSKMLRTGNNFEFTYNFEEVFPFHSSLAAPS  
MV18 361 FTLPQYGYATLNRDNTENPTERSSFFCLEYFPSKMLRTGNNFEFTYNFEEVFPFHSSFAFAPS  
MV20 361 FTLPQYGYATLNRDNTENPTERSSFFCLEYFPSKMLRTGNNFEFTYNFEEVFPFHSSFAFAPS  
MV50 361 FTLPQYGYATLNRDNTENPTERSSFFCLEYFPSKMLRTGNNFEFTYNFEEVFPFHSSFAFAPS  
MV53 361 FTLPQYGYATLNRDNTENPTERSSFFCLEYFPSKMLRTGNNFEFTYNFEEVFPFHSSFAFAPS

AAV5 421 QNLFKLANPLVDQYLYRFVSTNNTGGVQFNKNLAGRYANTYKNWFPGPMGRTQGWNLLGSG

```

MV1      421  QNLFKLANPLVDQYLYRFVSTNNTGGVQFNKNLAGRYANTYKNWFFPGPMMGRTQGWNLGSG
MV18     421  QNLFKLANPLVDQYLYRFVSTNNTGGVQFNKNLAGRYANTYKNWFFPGPMMGRTQGWNLGSG
MV20     421  QNLFKLANPLVDQYLYRFVSTNNTGGVQFNKNLAGRYANTYKNWFFPGPIIGRTQGWNLGSG
MV50     421  QNLFKLANPLVDQYLYRFVSTNNTGGVQFNKNLAGRYANTYKNWFFPGPMMGRTQGWNLGSG
MV53     421  QNLFKLANPLVDQYLYRFVSTNNTGGVQFNKNLAGRYANTYKNWFFPGPMMGRTQGWNLGSG

AAV5     481  VNRSVSASFATTNRMELEGASYQVPPQPNGMTNNLQGSNTYALENTMIFNSQPANPGTTA
MV1      481  VNRSVSASFATTNRMELEGASYQVPPQPNGMTNNLQGSNTYALENTMIFNSQPANPGTTA
MV18     481  VNRSVSASFATTNRMELEGASYQVPPQPNGMTNNLQGSNTYALENTMIFNSQPANPGTTA
MV20     481  VNRSVSASFATTNRMELEGASYQVPPQPNGMTNNLQGSNTYALENTMIFNSQPANPGTTA
MV50     481  VNRSVSASFATTNRMELEGASYQVPPQPNGMTNNLQGSNTYALENTMIFNSQPANPGTTA
MV53     481  VNRSVSASFATTNRMELEGASYQVPPQPNGMTNNLQGSNTYALENTMIFNSQPANPGTTA

AAV5     541  TYLEGNMLITSESETQPVNRVAYNVGGQMATNNQSSTTAPATGTYNLQEIVPGSVWMERD
MV1      541  TYLEGNMLITSESETQPVNRVAYNVGGQMATNNQSSTTAPATGTYNLQEIVPGSVWMERD
MV18     541  TYLEGNMLITSESETQPVNRVAYNVGGQMATNNQSSTTAPATGTYNLQEIVPGSVWMERD
MV20     541  TYLEGNMLITSESETQPVNRVAYNVGGQMATNNQSSTTTPATGTYNLQEIVPGSVWMERD
MV50     541  TYLEGNMLITSESETQPVNRVAYNVGGQMATNNQSSTTAPATGTYNLQEIVPGSVWMERD
MV53     541  TYLEGNMLITSESETQPVNRVAYNVGGQMATNNQSSTTAPATGTYNLQEIVPGSVWMERD

AAV5     601  VYLQGPIWAKIPETGAHFHPSPAMGGFGLKHPPPMMLIKNTPVPGNITSFSDVPVSSFIT
MV1      601  VYLQGPIWAKIPETGAHFHPSPAMGGFGLKHPPPMMLIKNTPVPGNITSFSDVPVSSFIT
MV18     601  VYLQGPIWAKIPETGAHFHPSPAMGGFGLKHPPPMMLIKNTPVPGNITSFSDVPVSSFIT
MV20     601  VYLQGPIWAKIPETGAHFHPSPAMGGFGLKHPPPMMLIKNTPVPGNITSFSDVPVSSFIT
MV50     601  VYLQGPIWAKIPETGAHFHPSPAMGGFGLKHPPPMMLIKNTPVPGNITSFSDVPVSSFIT
MV53     601  VYLQGPIWAKIPETGAHFHPSPAMGGFGLKHPPPMMLIKNTPVPGNITSFSDVPVSSFIT

AAV5     661  QYSTGQVTVEMEWELKKENSKRWNPEIQYTNNYNDPQFVDFAPDSTGEYRTTRPIGTRYL
MV1      661  QYSTGQVTVEMEWELKKENSKRWNPEIQYTNNYNDPQFVDFAPDSTGEYRTTRPIGTRYL
MV18     661  QYSTGQVTVEMEWELKKENSKRWNPEIQYTNNYNDPQFVDFAPDSTGEYRTTRPIGTRYL
MV20     661  QYSTGQVTVEMEWELKKENSKRWNPEIQYTNNYNDPQFVDFAPDSTGEYRTTRPIGTRYL
MV50     661  QYSTGQVTVEMEWELKKENSKRWNPEIQYTNNYNDPQFVDFAPDGTGEYRTTRPIGTRYL
MV53     661  QYSTGQVTVEMEWELKKENSKRWNPEIQYTNNYNDPQFVDFAPDSTGEYRTTRPIGTRYL

AAV5     721  TRPL
MV1      721  TRPL
MV18     721  TRPL
MV20     721  TRPL
MV50     721  TRPL
MV53     721  TRPL

```

Figure S2: Amino Acid Sequence Alignment of AAV5 and MV Mutants

Alignment of the amino acid sequences for each of the MV mutants and AAV5. The mutations that differ from AAV5 are highlighted in black with white font.

AAV1 MAADGYLPDWLEDNLSEGIREWWDLKPAPKPKANQQKQDDGRGLVLPGYKYLGPFGNGLD  
AAV6 MAADGYLPDWLEDNLSEGIREWWDLKPAPKPKANQQKQDDGRGLVLPGYKYLGPFGNGLD  
AAV2 MAADGYLPDWLEDNLSEGIREWWDLKPAPKPKANQQKQDDGRGLVLPGYKYLGPFGNGLD  
AAV3 MAADGYLPDWLEDNLSEGIREWWDLKPAPKPKANQQKQDDGRGLVLPGYKYLGPFGNGLD  
AAV7 MAADGYLPDWLEDNLSEGIREWWDLKPAPKPKANQQKQDDGRGLVLPGYKYLGPFGNGLD  
AAV8 MAADGYLPDWLEDNLSEGIREWWDLKPAPKPKANQQKQDDGRGLVLPGYKYLGPFGNGLD  
AAV9 MAADGYLPDWLEDNLSEGIREWWDLKPAPKPKANQQKQDDGRGLVLPGYKYLGPFGNGLD  
AAV4 -MTDGYLPDWLEDNLSEGIREWWDLKPAPKPKANQQKQDDGRGLVLPGYKYLGPFGNGLD  
MV MSFVDHPPDWLEEVG-EGLEFLGLEAGPPKPKPNQQHQDQARGLVLPGYNYLGPFGNGLD  
. : \*\*\*\*\*: \*\*:\*.: \*. \* \* \*. :.:\*: \*\*\*\*\*:\*\*\*\* \*

AAV1 KGEVNAADAAALEHDKAYDQQLKAGDNPYLRYNHADADEFQERLQEDTSFGGNLGRAVFQ  
AAV6 KGEVNAADAAALEHDKAYDQQLKAGDNPYLRYNHADADEFQERLQEDTSFGGNLGRAVFQ  
AAV2 KGEVNEADAAALEHDKAYDRQLDSDGNPYLRYNHADADEFQERLKEDTSFGGNLGRAVFQ  
AAV3 KGEVNEADAAALEHDKAYDQQLKAGDNPYLRYNHADADEFQERLQEDTSFGGNLGRAVFQ  
AAV7 KGEVNAADAAALEHDKAYDQQLKAGDNPYLRYNHADADEFQERLQEDTSFGGNLGRAVFQ  
AAV8 KGEVNAADAAALEHDKAYDQQLKAGDNPYLRYNHADADEFQERLQEDTSFGGNLGRAVFQ  
AAV9 KGEVNAADAAALEHDKAYDQQLKAGDNPYLRYNHADADEFQERLKEDTSFGGNLGRAVFQ  
AAV4 KGEVNAADAAALEHDKAYDQQLKAGDNPYLRYNHADADEFQERLQEDTSFGGNLGRAVFQ  
MV RGEVNRADDEVAREHDISYNEQLEAGDNPYLRYNHADADEFQERLQEDTSFGGNLGRAVFQ  
:\*\*\*\*\* \* . \* \* \* .\*:.\*.:\*\*\*\*\*:\*\*\*\*\*:.\* \*\*\*\*\*:\*\*\*\*

AAV1 AKKRVLEPLGLVEEGAKTAPGKKRPVEQSPQE-PDSSSGIGKTGQQPAKRLNFGQTGDS  
AAV6 AKKRVLEPLGLVEEGAKTAPGKKRPVEQSPQE-PDSSSGIGKTGQQPAKRLNFGQTGDS  
AAV2 AKKRVLEPLGLVEEPVKTAPGKKRPVEHSPVE-PDSSSGTGKAGQQPARKRLNFGQTGDA  
AAV3 AKKRILEPLGLVEEAAKTAPGKKRPVDQSPQE-PDSSSGVGKSGKQPARKRLNFGQTGDS  
AAV7 AKKRVLEPLGLVEEGAKTAPAKKRPVEPSQSPDSSSTGIGKKGQQPARKRLNFGQTGDS  
AAV8 AKKRVLEPLGLVEEGAKTAPGKKRPVEPSQSPDSSSTGIGKKGQQPARKRLNFGQTGDS  
AAV9 AKKRILLEPLGLVEEAAKTAPGKKRPVEQSPQE-PDSSAGIGKSGAQPAKRLNFGQTGDT  
AAV4 AKKRVLEPLGLVEQAGETAPGKKRPLIESPQQ-PDSSSTGIGKKGKQPAKRLNFGQTGDT  
MV AKKRVLEPLGLVEEGAKTAPTGRIDDHFPKR-----KKARTEEDSKPSTSSDAE  
\*\*\*\*\*:\*\*\*:\*\*\*\*\*: :\*\* \* \* \* . \* . :. . . .

AAV1 ESVPDPQPLGEPATPAAVGPTTASGGGAPMADNNEGADGVGNASGNWHCDSWLGDV  
AAV6 ESVPDPQPLGEPATPAAVGPTTASGGGAPMADNNEGADGVGNASGNWHCDSWLGDV  
AAV2 DSVDPDPQLGQPPAAPSGGLTNTMATGSGGAPMADNNEGADGVGNSSGNWHCDSWLMGDRV  
AAV3 ESVPDPQPLGEPAPAPTSLGNTTASGGGAPMADNNEGADGVGNSSGNWHCDSQWLGDV  
AAV7 ESVPDPQPLGEPAPAPSSVGSVTVAAGGAPMADNNEGADGVGNASGNWHCDSWLGDV  
AAV8 ESVPDPQPLGEPAPAPSGVGPNTMAAGGAPMADNNEGADGVGSSGNWHCDSWLGDV  
AAV9 ESVPDPQPIGEPAPAPSGVSLTASGGGAPVADNNEGADGVGSSGNWHCDSQWLGDV  
AAV4 GDGPP-----EGSTSGAMSDDSEMRAAGGAAGGQADGVGNASGDWHCDSWSEGHV  
MV AGPSGSQQRLIPAQPASSLGDATMSAGGGPLGDNNQAGDGVGNASGDWHCDSWLMGDRV  
. . . . : . : :.\*.. :.:\*\*\*\*\*:\*\*\*:\*\*\*\*\* \* . :\*

AAV1 ITTSTRTWALPTYNNHLYK---QIS-SASTGASNDNHYFGYSTPWGYFDNRFHCHFSR  
AAV6 ITTSTRTWALPTYNNHLYK---QIS-SASTGASNDNHYFGYSTPWGYFDNRFHCHFSR  
AAV2 ITTSTRTWALPTYNNHLYK---QIS-SQSG-ASNDNHYFGYSTPWGYFDNRFHCHFSR  
AAV3 ITTSTRTWALPTYNNHLYK---QIS-SQSG-ASNDNHYFGYSTPWGYFDNRFHCHFSR  
AAV7 ITTSTRTWALPTYNNHLYK---QISSETAG-STNDNTYFGYSTPWGYFDNRFHCHFSR  
AAV8 ITTSTRTWALPTYNNHLYK---QISNGTSGGATNDNTYFGYSTPWGYFDNRFHCHFSR  
AAV9 ITTSTRTWALPTYNNHLYK---QISNSTSGSSNDNAYFGYSTPWGYFDNRFHCHFSR  
AAV4 TTTSTRTWVLPPTYNNHLYKRLG-----ESLQSNTYNGFSTPWGYFDNRFHCHFSR  
MV VTKSTRTWVLPPTYNNHLYK---EIKSGSVDRLSNANAYFGYSTPWGYFDNRFHSHWSPR  
\* .\*\*\*\*\* .\*\*:\* \* \* \* : \* \* \* :\*\*\*\*\*:\*\*\*\*\* .\*:\*\*\*

AAV1 DWQRLINNNWGFPRPKRLNFKLFNIQVKEVTTNDGVTTIANNLTSTVQVFSDEYQLPYVL  
AAV6 DWQRLINNNWGFPRPKRLNFKLFNIQVKEVTTNDGVTTIANNLTSTVQVFSDEYQLPYVL  
AAV2 DWQRLINNNWGFPRPKRLNFKLFNIQVKEVTQNDGTTTIANNLTSTVQVFTDSEYQLPYVL  
AAV3 DWQRLINNNWGFPRPKKLSFKLFNIQVKEVTQNDGTTTIANNLTSTVQVFTDSEYQLPYVL  
AAV7 DWQRLINNNWGFPRPKKLSFKLFNIQVKEVTTNDGVTTIANNLTSTIQVFSDEYQLPYVL  
AAV8 DWQRLINNNWGFPRPKRLSFKLFNIQVKEVTQNEGTKTIANNLTSTIQVFTDSEYQLPYVL  
AAV9 DWQRLINNNWGFPRPKRLNFKLFNIQVKEVTQNDGVTIANNLTSTVQVFTSDYQLPYVL  
AAV4 DWQRLINNNWGMRPKAMRVKIFNIQVKEVTTNSGETTVANNLTSTVQIFADSSYELPYVM

MV DWQRLINNYWGFRRSLRVKIFNIQVKEVTVQDSTTTIANLNTSTVQVFTDDDYQLPYVV  
\*\*\*\*\* \*\*::: : .\*:\*\*\*\*\* :. . \*:\*\*\*\*\*:\*. \* .\*:\*\*\*\*\*:

AAV1 GSAHQGCLPPFPADVFMIPQYGYLTLNNG---SQAVGRSSFYCLEYFPSQMLRTGNNFTF  
AAV6 GSAHQGCLPPFPADVFMIPQYGYLTLNNG---SQAVGRSSFYCLEYFPSQMLRTGNNFTF  
AAV2 GSAHQGCLPPFPADVFMVMPQYGYLTLNNG---SQAVGRSSFYCLEYFPSQMLRTGNNFTF  
AAV3 GSAHQGCLPPFPADVFMVMPQYGYLTLNNG---SQAVGRSSFYCLEYFPSQMLRTGNNFQF  
AAV7 GSAHQGCLPPFPADVFMIPQYGYLTLNNG---SQSVGRSSFYCLEYFPSQMLRTGNNFEF  
AAV8 GSAHQGCLPPFPADVFMIPQYGYLTLNNG---SQAVGRSSFYCLEYFPSQMLRTGNNFQF  
AAV9 GSAHEGCLPPFPADVFMIPQYGYLTLNDG---SQAVGRSSFYCLEYFPSQMLRTGNNFQF  
AAV4 DAGQEGSLPPFPNDVFMVMPQYGYLTLNNG---SQAVGRSSFYCLEYFPSQMLRTGNNFEI  
MV GNGTEGCLPAFPQVFTLPQYGYATLNRDN-TENPTERSFFFCLEYFPSQMLRTGNNFEF  
. . :\*.\*\*.\* \*\* :\*\* :\*\*\*\*\* \* . . :. . \*.:\*\*\*\*\*:\*\*\*\*\* :

AAV1 SYTFEEDVPFHSSYAHSSQLDRLMNPLIDQYLYLNRTO-NQSGSAQNKDLLFSRGS PAMG  
AAV6 SYTFEDVPFHSSYAHSSQLDRLMNPLIDQYLYLNRTO-NQSGSAQNKDLLFSRGS PAMG  
AAV2 SYTFEDVPFHSSYAHSSQLDRLMNPLIDQYLYLSRTN-TPSGTTTQSRLOFSQAGASDI  
AAV3 SYTFEDVPFHSSYAHSSQLDRLMNPLIDQYLYLNRTOGTTSGTTNQSRLFSQAGPQSM  
AAV7 SYSFEDVPFHSSYAHSSQLDRLMNPLIDQYLYLARTQSNPGGTAGNRELQFYQGGPSTM  
AAV8 TYTFEDVPFHSSYAHSSQLDRLMNPLIDQYLYLSRTQTGG-TANTQTLGFSQGGPNTM  
AAV9 SYEFENVPFHSSYAHSSQLDRLMNPLIDQYLYLSKTINGSG--QNQQTLKFSVAGPSNM  
AAV4 TYSFEKVPFHSSYAHSSQLDRLMNPLIDQYLWGLQSTTTGTTLNAGTATNFTKLRPTNF  
MV TYNFEEVPFHSS LAPSQNLFLKLANPLVDQYLYRFVSTN-----NTGGVQFNKNLAGRY  
:\* \*\*.\*\*\*\*\*\* \* \*\*.\* :\* \*\*.\*\*\*\*\*\*: : \*

AAV1 SVQPKNWLPGPCYRQQRVSKTKTD-----NNNSNFTWTGASKYNLNGRESI INPGTAMAS  
AAV6 SVQPKNWLPGPCYRQQRVSKTKTD-----NNNSNFTWTGASKYNLNGRESI INPGTAMAS  
AAV2 RDQSRNWLPGPCYRQQRVSKTSAD-----NNNSEYSWTGATKYHLNGRDSL VN--PAMAS  
AAV3 SLQARNWLPGPCYRQQRVSKTAND-----NNNSNFPWTAAASKYHLNGRDSL VNPGPAMAS  
AAV7 AEQAKNWLPGPCFRQQRVSKTLDQ-----NNNSNFAWTGATKYHLNGRDSL VNPGVAMAT  
AAV8 ANQAKNWLPGPCYRQQRVSTTTGQ-----NNNSNFAWTAGTKYHLNGRDSL ANPGIAMAT  
AAV9 AVQGRNYIPGPSYRQQRVSTTVTQ-----NNNSEFAWPAGSSWALNGRDSL MNPGPAMAS  
AAV4 SNFKKNWLPGPSIKQQGFSKTANQNYKIPATGSDSLIKYETHSTLDGRWSALTPGPPMAT  
MV ANTYKNWFPGPMGRTQGWNLGSGVN-----RASVSATATNRMELEGASYQVPPQPNGMT  
:\*. :\*\*\* : \* . \* . \* :\*

AAV1 HKDDEDKFFPMSGVMI FGKESAGA---SNTALDNVMI TDEEE IKATNPVATERFGTVAVN  
AAV6 HKDDKDKFFPMSGVMI FGKESAGA---SNTALDNVMI TDEEE IKATNPVATERFGTVAVN  
AAV2 HKDDEEKFFPQSGVLI FGKQSGSEK---TNVNI EKVMITDEEE IGTTPVATEQYGSVSTN  
AAV3 HKDDEEKFFPMHGNI LFGKEGTTA---SNAELDNVMI TDEEE IRTTPVATEQYGTVANN  
AAV7 HKDDEDKFFPSSGVLI FG-KTGAT---NKTTLENVLMTNEEE IRTTPVATEEYGVSSN  
AAV8 HKDDEERFFPSSGIL I FGKQNAAR---DNADYSDVMLTSEEE IKTTNPVATEEYGVADN  
AAV9 HKEGEDRFFPSSGIL I FGKQGTGR---DNVDADKVMITNEEE IKTTNPVATESYGVQVATN  
AAV4 AGPADSKFS-NSQLIFAGPKQNGN---TATVPGTLIFTSEEE LAATNATDVTDMWGNLPGG  
MV NNLQGSNTYALENTMI FNSQPANPGTTATYLEGNMLITSESETQPVNRVAYNVGGQMATTN  
. . :. . : :\*.\*\*.\* ..\* . : \* :. .

AAV1 FQSSSTDPATGDVHAMGALPGMVWQDRDVYLQGP IWAKI PHTDGHFHPSPLMGGFGLKHP  
AAV6 LQSSSTDPATGDVHVMGALPGMVWQDRDVYLQGP IWAKI PHTDGHFHPSPLMGGFGLKHP  
AAV2 LQRGNRQAATADVNTQGVLPGMVWQDRDVYLQGP IWAKI PHTDGHFHPSPLMGGFGLKHP  
AAV3 LQSSNTAPTTRTVNDQGALPGMVWQDRDVYLQGP IWAKI PHTDGHFHPSPLMGGFGLKHP  
AAV7 LQAANTAAQTQVNNQGALPGMVWQNRDVYLQGP IWAKI PHTDGNFHPSPLMGGFGLKHP  
AAV8 LQQQNTAPQIGTVNSQGALPGMVWQNRDVYLQGP IWAKI PHTDGNFHPSPLMGGFGLKHP  
AAV9 HQSAQAQAQTGWVQNGILPGMVWQDRDVYLQGP IWAKI PHTDGNFHPSPLMGGFGMKHP  
AAV4 DQSNLPTVDRLTALGAVPGMVWQNRDIYYQGP IWAKI PHTDGHFHPSPLIGGFGLKHP  
MV NQSSSTPATGTYNLQEI VPGSVWMERDVYLQGP IWAKI PETGAHFHPS PAMGGFGLKHP  
\* . :\*\* \*\* :\*\*.\* \*\*\*\*\*.\* .\*:\*\*\*\*\* :\*\*\*\*\*:\*. \*

AAV1 PPQILIKNTPVPANPPAEFSATKFASFITQYSTGQVSVEIEWELQKENS KRWNPEVQYTS  
AAV6 PPQILIKNTPVPANPPAEFSATKFASFITQYSTGQVSVEIEWELQKENS KRWNPEVQYTS  
AAV2 PPQILIKNTPVPANPSTTFAAKFASFITQYSTGQVSVEIEWELQKENS KRWNPEIQYTS  
AAV3 PPQIMIKNTPVPANPPTTFAAKFASFITQYSTGQVSVEIEWELQKENS KRWNPEIQYTS  
AAV7 PPQILIKNTPVPANPPEVFTPAKFASFITQYSTGQVSVEIEWELQKENS KRWNPEIQYTS

```

AAV8      PPQILIKNTPVPADPPTTFNQSKLNSFITQYSTGQVSVEIEWELQKENSKRWNPEIQYTS
AAV9      PPQILIKNTPVPADPPTAFNKDKLNSFITQYSTGQVSVEIEWELQKENSKRWNPEIQYTS
AAV4      PPQIFIKNTPVPANPATTFSSFPVNSFITQYSTGQVSVQIDWEIQKERSKRWNPEVQFTS
MV        PPMMLIKNTPVPGN-ITSFSDVPVSSFITQYSTGQVTVEMEWELKKENSKRWNPEIQYTN
          **  : :*****.: * . . *****: * : : * : * . *****: * : * .

AAV1      NYAKSANVDFTVDNNGLYTEPRPIGTRYLTRPL
AAV6      NYAKSANVDFTVDNNGLYTEPRPIGTRYLTRPL
AAV2      NYNKSVNRGLTVDTNGVYSEPRPIGTRYLTRNL
AAV3      NYNKSVNVDFTVDTNGVYSEPRPIGTRYLTRNL
AAV7      NFEKQTGVDFAVDSQGVYSEPRPIGTRYLTRNL
AAV8      NYYKSTSVDFAVNTEGVYSEPRPIGTRYLTRNL
AAV9      NYYKSNNVEFAVNTEGVYSEPRPIGTRYLTRNL
AAV4      NYGQQNSLLWAPDAAGKYTEPRAIGTRYLTHHL
MV        NYNDPQFVDFAPDGTGEYRSTRPIGTRYLTRPL
          * : . : : * * ..* .*****: *

```

Figure S3: Alignment of All Mutations found in MV Mutants with Other AAV Serotypes

Alignment of AAV serotypes 1 through 9 against MV which contains all of the mutations found in the MV mutants pooled into one sequence. Mutations are highlighted in red.



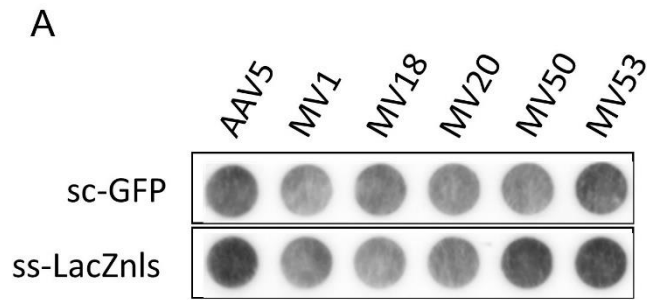

**B**

| AAV5 and MV Mutant Viral Titer |                   |                    |
|--------------------------------|-------------------|--------------------|
| Virus                          | sc-GFP<br>(vg/ml) | ss-LacZ<br>(vg/ml) |
| AAV5                           | 2.10E+12          | 3.78E+12           |
| MV1                            | 1.35E+12          | 1.46E+12           |
| MV18                           | 1.50E+12          | 1.96E+12           |
| MV20                           | 1.40E+12          | 2.36E+12           |
| MV50                           | 1.45E+12          | 3.54E+12           |
| MV53                           | 2.30E+12          | 3.76E+12           |

Figure S4: Production Yield of AAV5 and MV Mutants

(A) DNA dotblot for the yield of each mutant and AAV5 for two versions of the virus, sc-GFP and ss-LacZnls. (B) Production titers for each capsid and each transgene version.

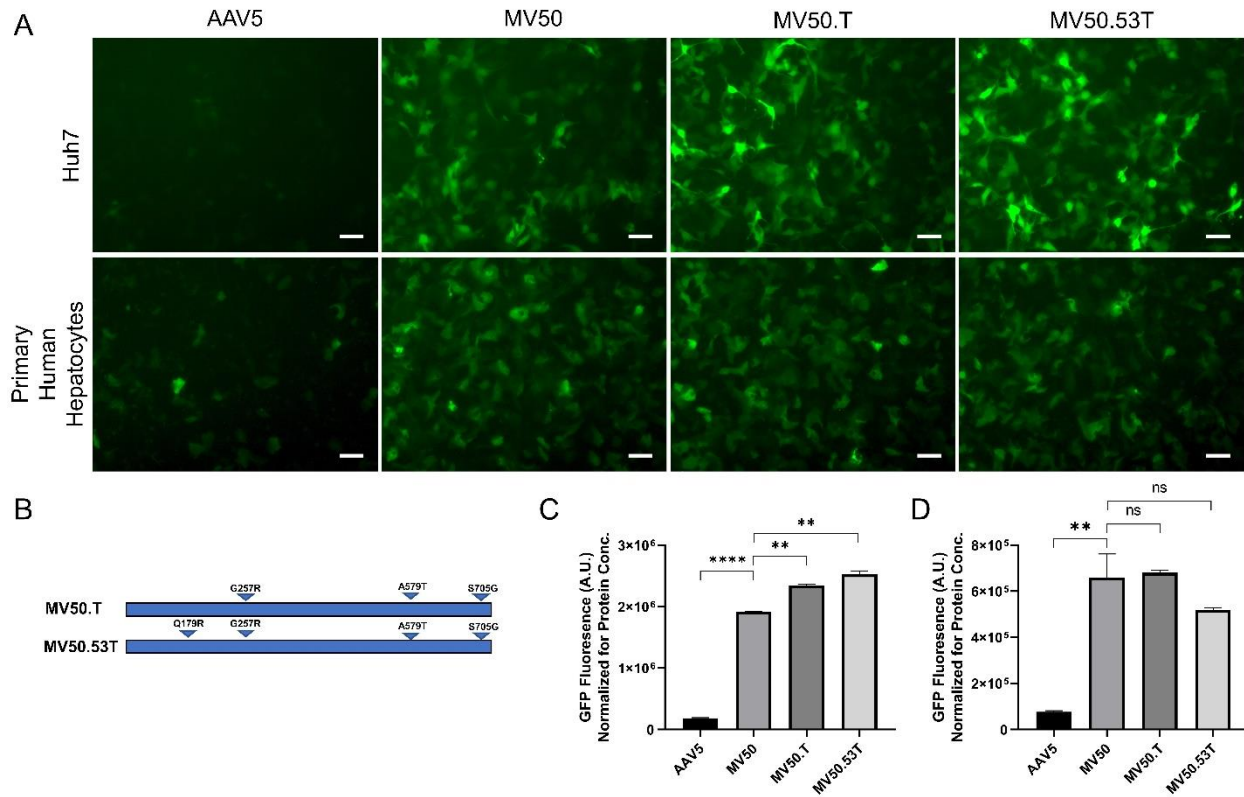

Figure S5. Combination of Mutations from multiple AAV5 Variants

(A) Fluorescent imaging of Huh7 cells and primary human hepatocytes (TRL HUM4020) transduced with self-complementary GFP vectors with AAV5, MV50, MV50.T, and MV50.53T. Huh7 cells were transduced at a MOI of 1e5 vg/cell and human hepatocytes were transduced at a MOI of 5e5vg/cell. Images were taken 96 hours after infection. Expression of GFP (green) indicates transduced cells. 10x magnification. Scale Bar: 100um. (B) Depiction of the combined mutations that are in MV50.T and MV50.53T. Location of amino acid mutations in the AAV5 VP1 amino acid sequence are indicated by triangles. The exact mutation is indicated above the triangle. (C) Comparison of normalized GFP expression in Huh7 cells between AAV5, MV50, MV50.T, and MV50.53T. Data are shown as mean values  $\pm$  SD. \*\* $p < 0.01$ ; \*\*\*\* $p < 0.0001$ . (D) Comparison of normalized GFP expression in primary human hepatocytes between AAV5, MV50, MV50.T, and MV50.53T. Data are shown as mean values  $\pm$  SD. \*\* $p < 0.01$ .

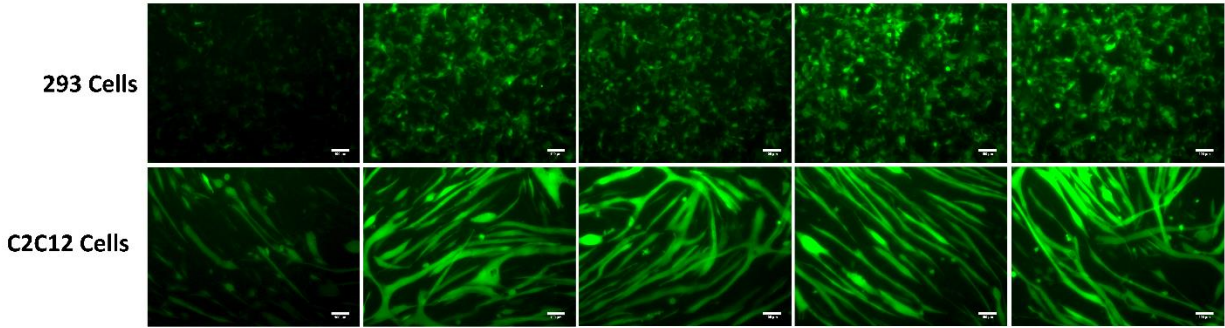

Figure S6. Transduction Efficiency of MV Mutants Compared to AAV5 in 293 and Differentiated C2C12 Cells

(A) Fluorescent imaging of 293 cells and differentiated C2C12 cells transduced with self-complementary GFP vectors packaged by AAV5, MV1, MV18, MV50, and MV53. Both cell lines were transduced at a MOI of  $4 \times 10^5$  vg/cell. Images were taken 96 hours after infection. Expression of GFP (green) indicates transduced cells. 10x magnification. Scale Bar: 100um.

Table S1: Replacement of AAV5 Loop1/VRI Amino Acid Sequence with Other AAV Serotype Loop1

| AAV Serotype | Loop1 Sequence  | Packages DNA? | Infectious on 293? | Infectious in Mice? |
|--------------|-----------------|---------------|--------------------|---------------------|
| 1            | ISSASTGASNDNHY  | No            | No                 | No                  |
| 2            | ISSQSGASNDNHY   | No            | No                 | No                  |
| 4            | LGESLQSNTYN     | No            | No                 | No                  |
| 7            | ISSETAGSTNDNTY  | Yes           | No                 | No                  |
| 8            | ISNGTSGGATNDNTY | No            | No                 | No                  |
| 9            | ISNGTSGGSTNDNTY | No            | No                 | No                  |
| Avian        | IQGPGGTDPNNKFF  | Yes           | No                 | No                  |

Replacement of AAV5 Loop1/VRI amino acid sequence with other AAV serotypes Loop1/VRI sequence. The sequence IKSGSVDGSNANAY was replaced with the sequence indicated in the table using PCR-based cloning. Modified AAV5 capsids were then used to package DNA and tested for their infectivity in 293 cells and mice.

## **Supplemental Methods**

### **Transduction of 293 Cells by AAV Vectors**

Variant AAV5 vectors were used to packaged sc-GFP reporter genes for comparison to wt-AAV5. 293 cells in 12 well plates were infected with AAV5 and mutant self-complementary(sc)-GFP encoding viruses at a MOI of 400,000 viral genomes(vg) per cell and co-infected with 5000 vg/cell of wt-ad5. Ninety-six hours after infection, cells were taken for fluorescent imaging.

### **Transduction of Differentiated C2C12 Cells by AAV Vectors**

Variant AAV5 vectors were used to packaged sc-GFP reporter genes for comparison to wt-AAV5. C2C12 myoblasts were seeded in 12 well plates were cultured with DMEM supplemented with 10% FBS and 1% penicillin/streptomycin (p/s). Upon reaching 70% confluency, culture medium was changed to differentiated medium (DMEM with 2% horse serum and 1% p/s). C2C12 cells were differentiated for five days prior to infection with AAV5 and mutant self-complementary(sc)-GFP encoding viruses at a MOI of 400,000 viral genomes(vg) per cell and co-infected with 5000 vg/cell of wt-ad5. Ninety-six hours after infection, cells were taken for fluorescent imaging. Differentiation medium was changed every two days.
